# Supplementary material for: One-pot synthesis of strong solid state emitting mono-cyclometalated iridium(iii) complexes: study of their aggregation induced enhanced phosphorescence
Source: Royal Society of Chemistry journal article supplement (doi:10.1039/c2dt30771e), 2012-01-01
Supplement: c2dt30771e.pdf [file c2dt30771e.pdf]

## Supporting documents

# One-Pot Synthesis of Strong Solid State Emitting Monocyclometalated Iridium(III) Complexes: Study of their Aggregation Induced Enhanced Phosphorescence

Parvej Alam<sup>a</sup>, Maheswararao Karanam<sup>b</sup>, Angshuman Roy Choudhury<sup>b</sup>, Inamur R Laskar<sup>a\*</sup>

<sup>a</sup>Department of Chemistry, Birla Institute of Technology and Science (BITS), Pilani, Rajasthan, 333 031, India

<sup>b</sup>Department of Chemical Sciences, Indian Institute of Science Education and Research (IISER), Mohali, S. A. S. Nagar, Sector 81, Manauli PO, Mohali, 140306, India

## Experimental

**Materials:** Iridium(III) chloride hydrate, 2-phenylpyridine, 2-chloropyridine, 2,4-difluoroboronic acid, palladium(0)tetrakis(triphenylphosphine), triphenylphosphine, 2-ethoxyethanol were purchased from Sigma Aldrich Chemical Company Ltd. The solvents were bought from Merck company.

**Characterization:** <sup>1</sup>HNMR, <sup>13</sup>CNMR and <sup>31</sup>PNMR spectra were recorded in 400 MHz Bruker NMR spectroscopy. Infra-red spectrum was recorded in FTIR Shimadzu (IR prestige-21). UV-Vis absorption spectra were recorded in Shimadzu Spectrophotometer with model UV-1800. The photoluminescence (PL) spectra were recorded in Spectrofluorometer (Fluoro max-4) Horiba Jobin Yvon. The excitations used for PL are 380nm, 385nm and 375nm for Flrpic, **2a** and **2b**, respectively (in solid/solution state). Elemental analyses were furnished on Elementar, VARIO III. SEM image was obtained by JEOL JSM-6390LV. Emission life-time in thin-film were obtained by exponential fit of emission decay curves recorded on Horiba Jobin Yvon model fluorocube-01-NL Spectrofluorometer.

..

**Syntheses and characterizations of 1, 2a and 2b:** To a stirred solution of  $\text{IrCl}_3 \cdot 3\text{H}_2\text{O}$  (0.5025 mmol) in 2-ethoxy ethanol (6 mL), triphenylphosphine (1.507 mmol) was added and the reaction mixture was refluxed at  $130^\circ\text{C}$  for **5h**. Then, 2-phenylpyridine (for **2a**) [2-(2,4-difluorophenyl)pyridine (for **2b**)] (1.252 mmol) were added to the reaction mixture and it was further refluxed for **3h**. The reaction mass was brought to room temperature. The resulted solid mass was triturated and washed with hexane followed by ethanol for several times to obtain a light green solid (57%) of **2a** (**2b**). These complexes were purified through recrystallization from a mixture of DCM and hexane (1:1). X-ray quality single crystals of **2b** were collected from the solution. The intermediate, **1** was synthesized on refluxing the mixture of  $\text{IrCl}_3 \cdot 3\text{H}_2\text{O}$  and triphenylphosphine in 2-ethoxyethanol for 5h. The solid pale yellow product was separated out from the solution, filtered and washed the residue by methanol and ethylacetate for several times. For **1**,  $^1\text{H}$ NMR (400 MHz,  $\text{CDCl}_3$ )  $\delta$  7.57 (dd,  $J = 14.0, 7.5$  Hz, 1H), 7.45 – 7.37 (m, 9H), 7.24 – 7.19 (m, 5H), 7.08 (dt,  $J = 17.0, 8.1$  Hz, 12H), 6.99 (t,  $J = 7.5$  Hz, 12H), 6.82 – 6.75 (m, 4H), - 19.27 (dt,  $J = 29.2, 8.5$  Hz, 1H);  $^{13}\text{C}$ NMR (101 MHz,  $\text{CDCl}_3$ )  $\delta$  207.00, 206.95, 135.30, 135.20, 135.10, 135.05, 135.00, 132.67, 132.40, 132.16, 132.13, 132.06, 131.96, 129.56, 129.19, 128.57, 128.45, 127.16, 127.11, 127.06, 127.01, 126.90, 30.94;  $^{31}\text{P}$  NMR (162 MHz,  $\text{CDCl}_3$ )  $\delta$  2.41, 7.54, 9.54. Anal. Calc for  $\text{C}_{54}\text{H}_{45}\text{P}_3\text{ClIr}$  (MW = 1013.80): C, 63.92; H, 4.44. Found. C, 63.90, H, 4.47.

For **2a**,  $^1\text{H}$  NMR (400 MHz,  $\text{CDCl}_3$ )  $\delta$  8.86 (d,  $J = 5.5$  Hz, 1H), 7.35 – 7.22 (m, 14H), 7.10 (t,  $J = 7.3$  Hz, 7H), 7.05 – 6.98 (m, 12H), 6.57 – 6.47 (m, 2H), 6.29 (d,  $J = 7.8$  Hz, 1H), 5.97 – 5.80 (m, 1H).  $^{13}\text{C}$  NMR (101 MHz,  $\text{CDCl}_3$ )  $\delta$  166.31, 149.61, 143.46, 135.28, 134.10, 134.05, 133.99, 132.03, 131.77, 131.51, 130.04, 128.88, 127.26, 127.21, 127.16, 122.36, 120.43, 119.21, 117.00;  $^{31}\text{P}$ NMR (162 MHz,  $\text{CDCl}_3$ )  $\delta$  9.25. Anal. Calc for  $\text{C}_{47}\text{H}_{39}\text{NP}_2\text{ClIr}$  (MW = 906.80): C, 62.20; H, 4.30, N, 1.54. Found. C, 62.18, H, 4.33, N, 1.55.

For  $\text{F}_2\text{ppy}$ ,  $^1\text{H}$ NMR (400 MHz,  $\text{d}^6$ -DMSO)  $\delta$  8.72 (d,  $J = 4.6$  Hz, 1H), 7.99 (dd,  $J = 16.3, 8.3$  Hz, 1H), 7.91 (t,  $J = 7.7$  Hz, 1H), 7.77 (d,  $J = 7.9$  Hz, 1H), 7.44 – 7.35 (m, 2H), 7.24 (t,  $J = 8.4$  Hz, 1H).

For **2b**,  $^1\text{H}$  NMR (400 MHz,  $\text{CDCl}_3$ )  $\delta$  8.94 (d,  $J = 5.5$  Hz, 1H), 7.75 (d,  $J = 8.6$  Hz, 1H), 7.46 – 7.24 (m, 13H), 7.14 (t,  $J = 7.3$  Hz, 6H), 7.10 – 7.04 (m, 12H), 6.66 – 6.55 (m, 1H), 5.94 (ddd,  $J =$

..

13.1, 9.0, 2.4 Hz, 1H), 5.69 (dd,  $J = 9.5, 2.1$  Hz, 1H).  $^{13}\text{C}$  NMR (101 MHz,  $\text{CDCl}_3$ )  $\delta$  149.90, 136.06, 134.02, 133.97, 133.92, 131.53, 131.27, 131.01, 129.26, 127.41, 127.36, 127.31, 126.55, 121.63, 121.46, 120.66;  $^{31}\text{P}$  NMR (162 MHz,  $\text{CDCl}_3$ )  $\delta$  7.78. Anal. Calc for  $\text{C}_{47}\text{H}_{37}\text{NP}_2\text{F}_2\text{ClIr}$  (MW = 942.80): C, 59.82; H, 3.92, N, 1.48. Found. C, 59.79, H, 3.91, N, 1.47.

**Fabrication of thin-film of 2a and 2b on substrate for PL measurement:** The  $10^{-3}\text{M}$  solution of **2a**, **2b** and FIrpic (in toluene) were prepared. Two drops of the solution were placed on thin glass substrate ( $2 \times 2\text{cm}^2$ ) and the solvent was allowed to evaporate slowly.

**Fabrication of thin-film for SEM image:** Two drops of solution of **2a** in 90%  $\text{H}_2\text{O}/\text{THF}$  was poured onto the Si-wafer ( $2 \times 2\text{cm}^2$ ). The solvent was allowed to evaporate and the film was dried in vacuum.

**Preparation of solution of THF/ $\text{H}_2\text{O}$  and THF/PEG of 2a (2b) for PL measurement:**  $10^{-4}\text{M}$  stock solution of **2a** (**2b**) was prepared in THF. Four 10ml volumetric flasks were taken and labeled them as 0%, 30%, 60% and 90%. 1mL of stock solution was added to each of the flask. Then, volume was filled to 10ml through addition of 9ml, 6ml, 3ml and 1ml water to 0%, 30%, 60% and 90% labeled flasks, respectively. The solution of **2a** (**2b**) in THF/PEG was prepared in the same way.

#### **X-ray single crystal diffraction study:**

Single crystal X-ray diffraction data were collected on Bruker AXS Kappa Apex II diffractometer equipped with Oxford Cryosystem 700Plus liquid nitrogen based cooling device. The data set was recorded at 100K using  $\phi$  and  $\omega$  scans such that the data is completed up to 70 degrees in two theta. Data reduction and standard processing were done using APEX II<sup>1</sup> suite available from Bruker AXS. The crystal structure was solved using direct methods (SHELXS97)<sup>2</sup> available in the Olex2<sup>3</sup> suite and the structure was refined by full matrix least squares refinement process using SHELXL97.<sup>2</sup> Geometric calculations were carried out using PARST97<sup>4</sup> and PLATON97.<sup>5</sup>

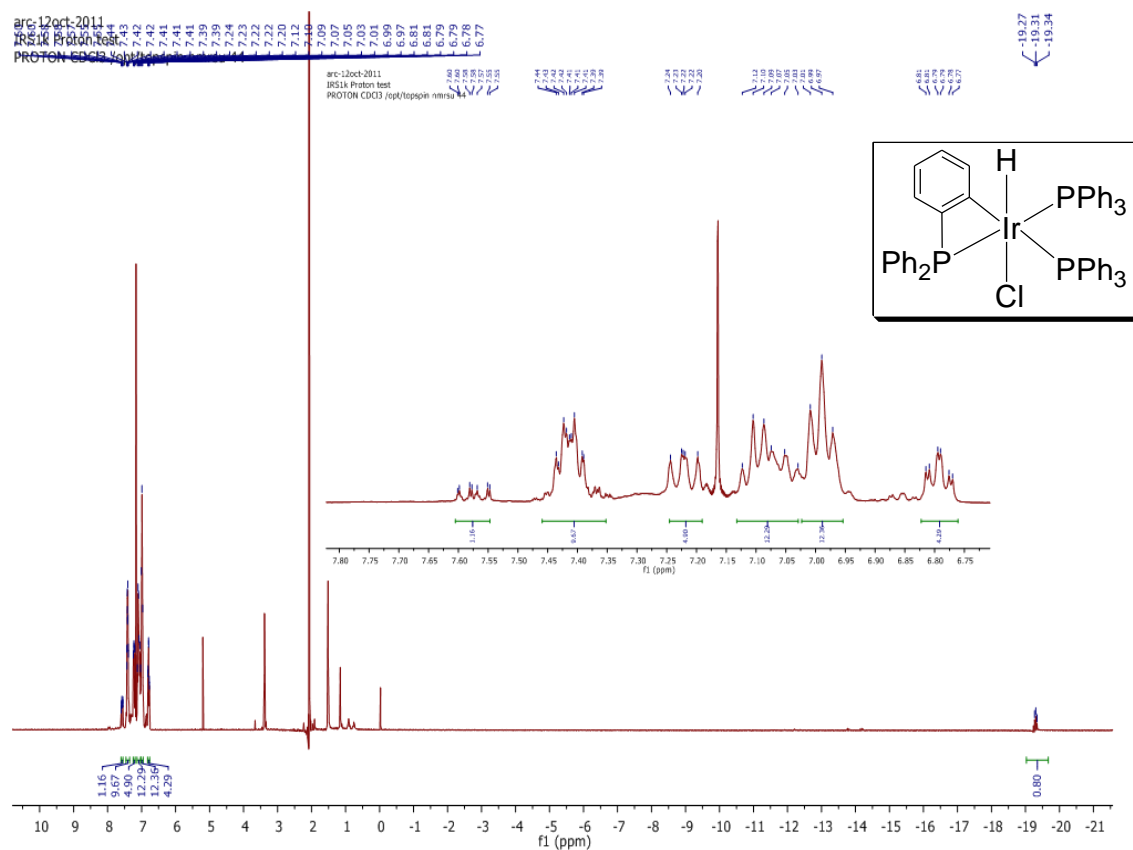

**Fig. S1**  $^1\text{H}$ NMR spectrum for the second intermediate, **1** [ $\delta$  7.57 (dd,  $J = 14.0, 7.5$  Hz, 1H), 7.45 – 7.37 (m, 9H), 7.24 – 7.19 (m, 5H), 7.08 (dt,  $J = 17.0, 8.1$  Hz, 12H), 6.99 (t,  $J = 7.5$  Hz, 12H), 6.82 – 6.75 (m, 4H), -19.27 (dt,  $J = 29.2, 8.5$  Hz, 1H)].

..

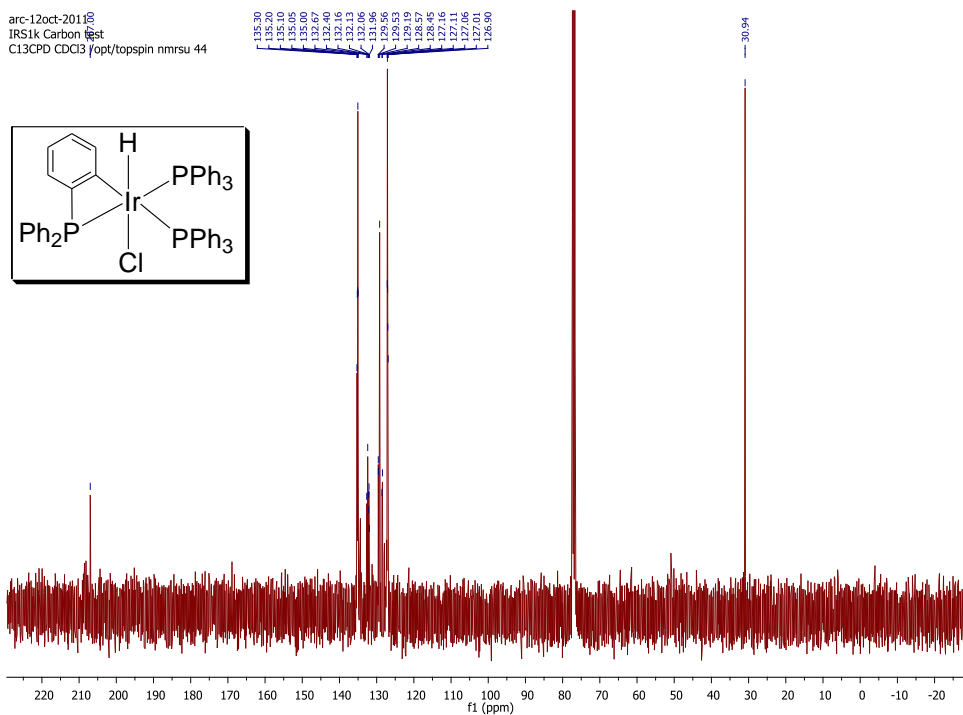

**Fig. S2.** <sup>13</sup>CNMR spectrum for the second intermediate, **1** ( $\delta$  207.00, 206.95, 135.30, 135.20, 135.10, 135.05, 135.00, 132.67, 132.40, 132.16, 132.13, 132.06, 131.96, 129.56, 129.19, 128.57, 128.45, 127.16, 127.11, 127.06, 127.01, 126.90, 30.94).

..

arc-12oct-2011  
IRS1k P31 test  
P31 CDCl3 /opt/topspin hmrsv 44

—7.54

—9.54

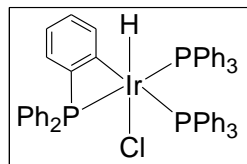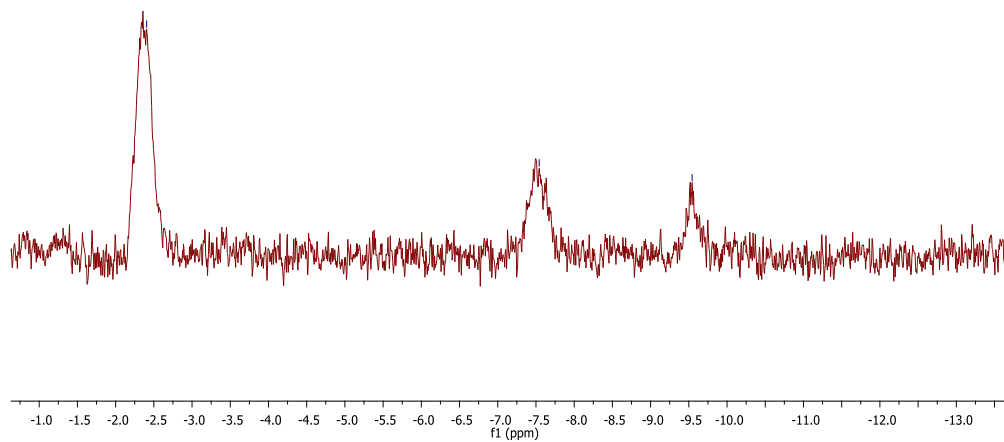

**Fig. S3**  $^{31}\text{P}$ NMR spectrum for the second intermediate, **1** ( $\delta$  2.41, 7.54, 9.54).

..

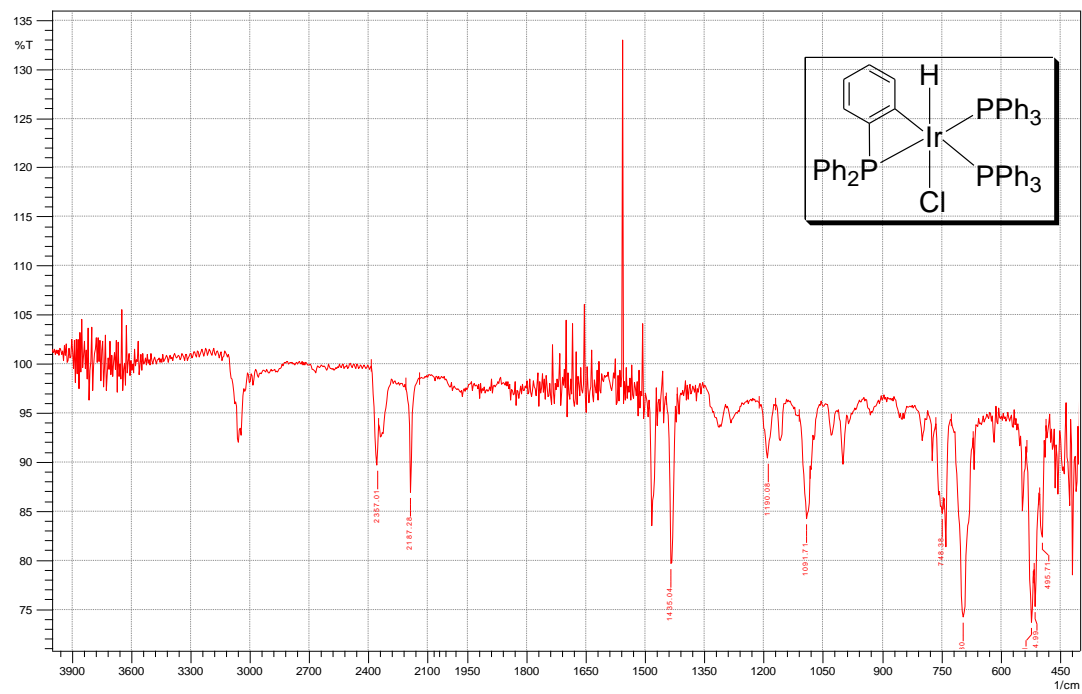

**Fig. S4** FTIR spectrum for **1** ( $2187 \text{ cm}^{-1}$  shows the  $\nu(\text{Ir-H})\text{cm}^{-1}$ ).

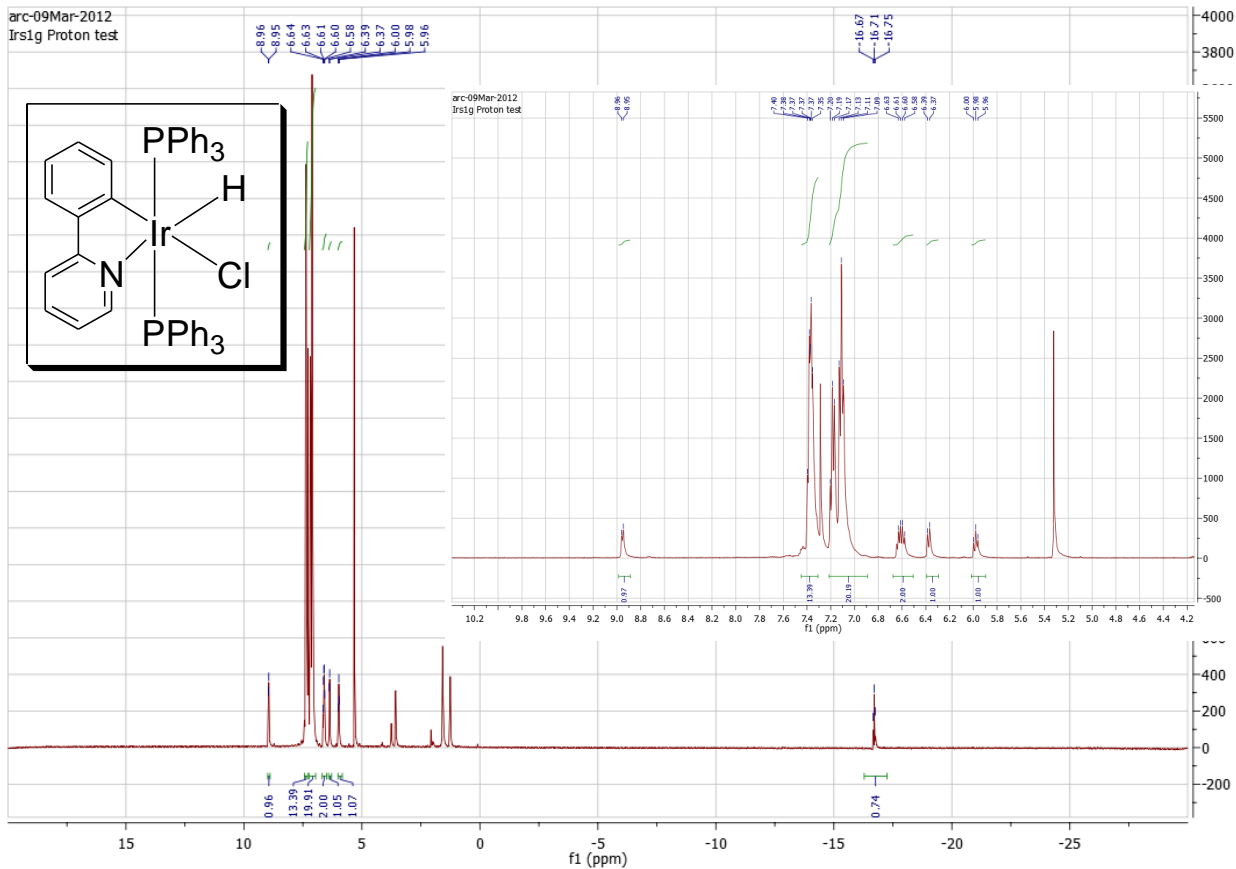

**Fig. S5** <sup>1</sup>H NMR spectrum for the complex, **2a** [ $\delta$  8.86 (d,  $J$  = 5.5 Hz, 1H), 7.35 – 7.22 (m, 14H), 7.10 (t,  $J$  = 7.3 Hz, 7H), 7.05 – 6.98 (m, 12H), 6.57 – 6.47 (m, 2H), 6.29 (d,  $J$  = 7.8 Hz, 1H), 5.97 – 5.80 (m, 1H)].





..

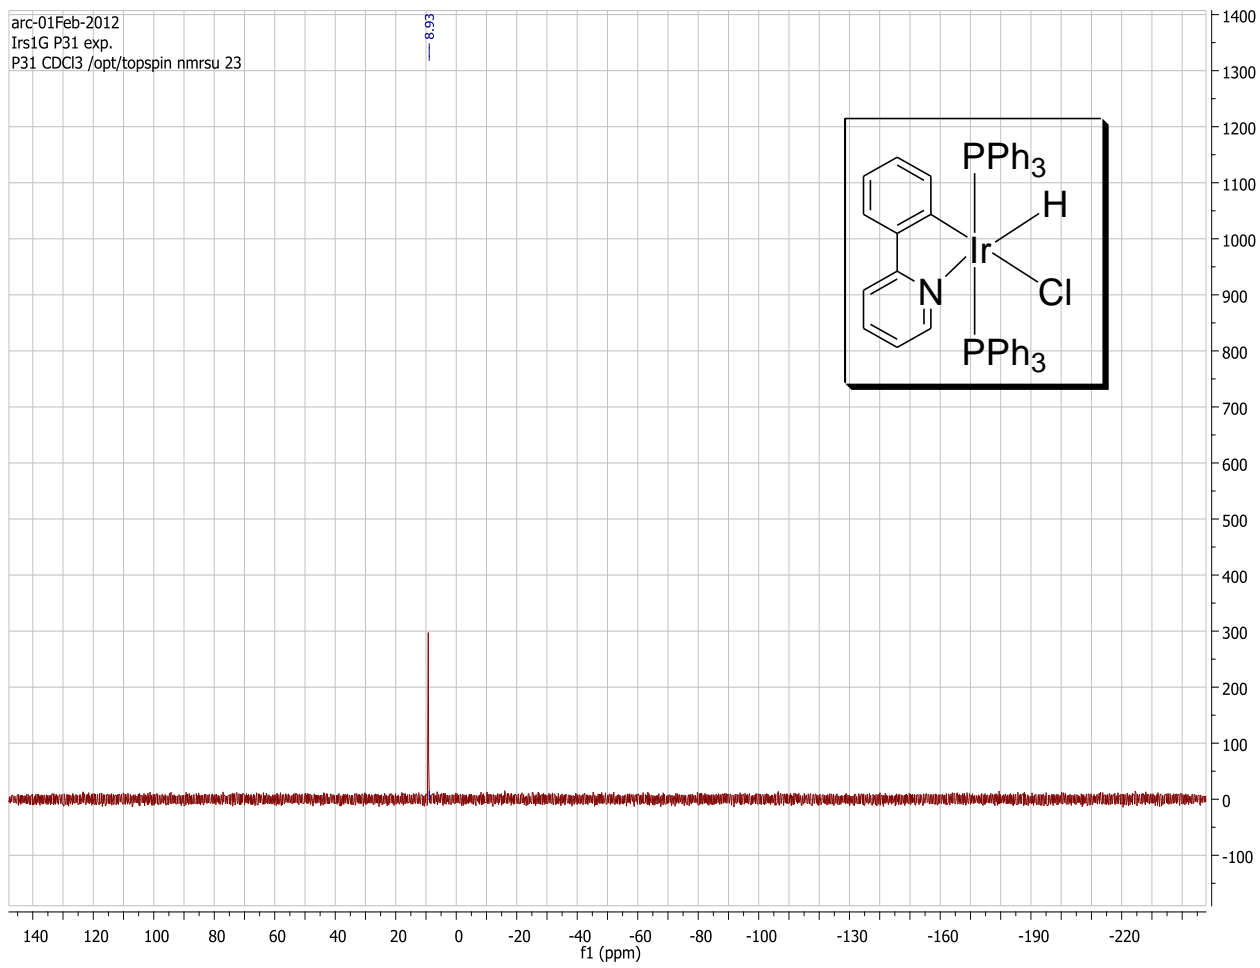

**Fig. S7** <sup>31</sup>P NMR spectrum for **2a** ( $\delta$  9.25).

..

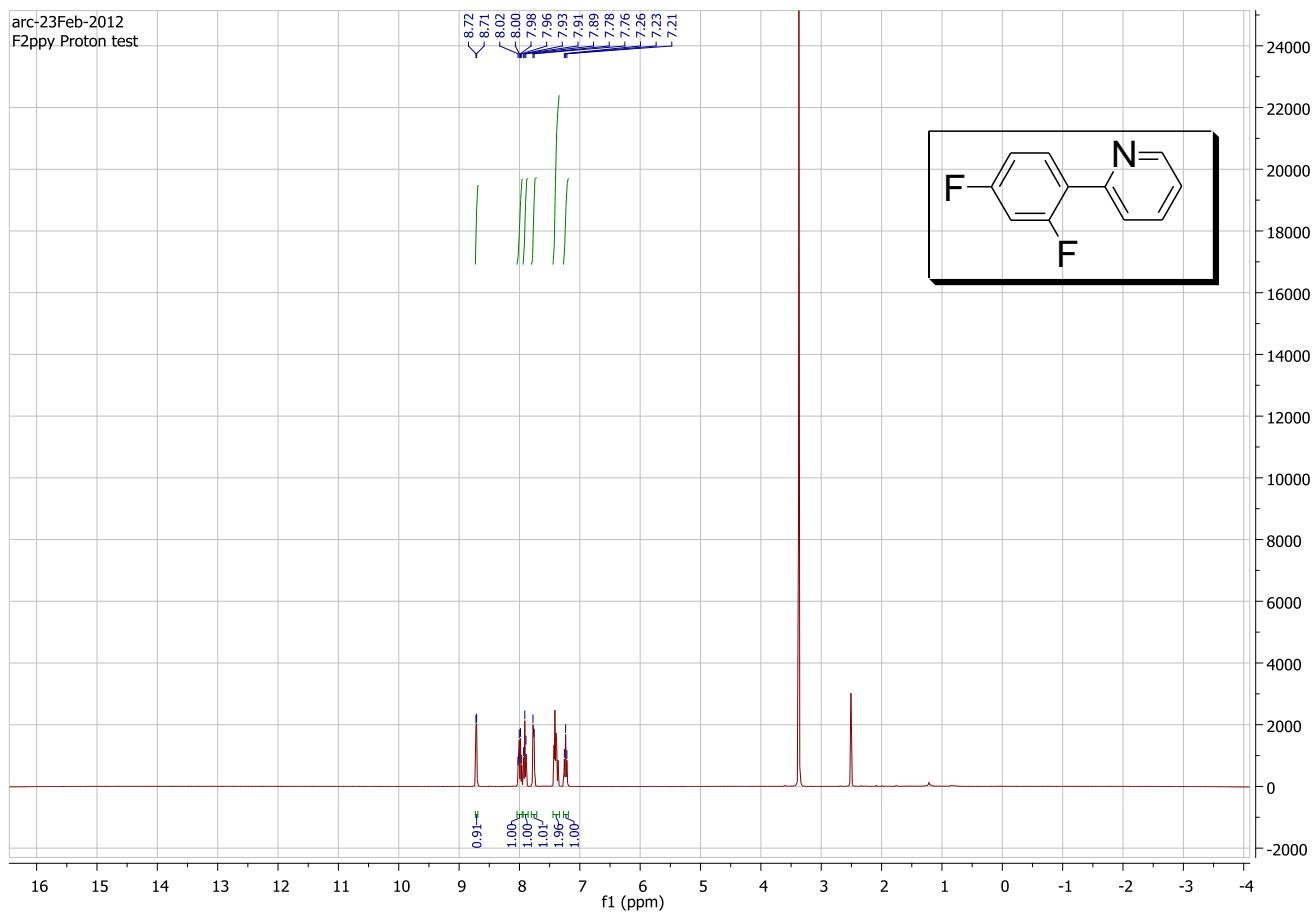

A

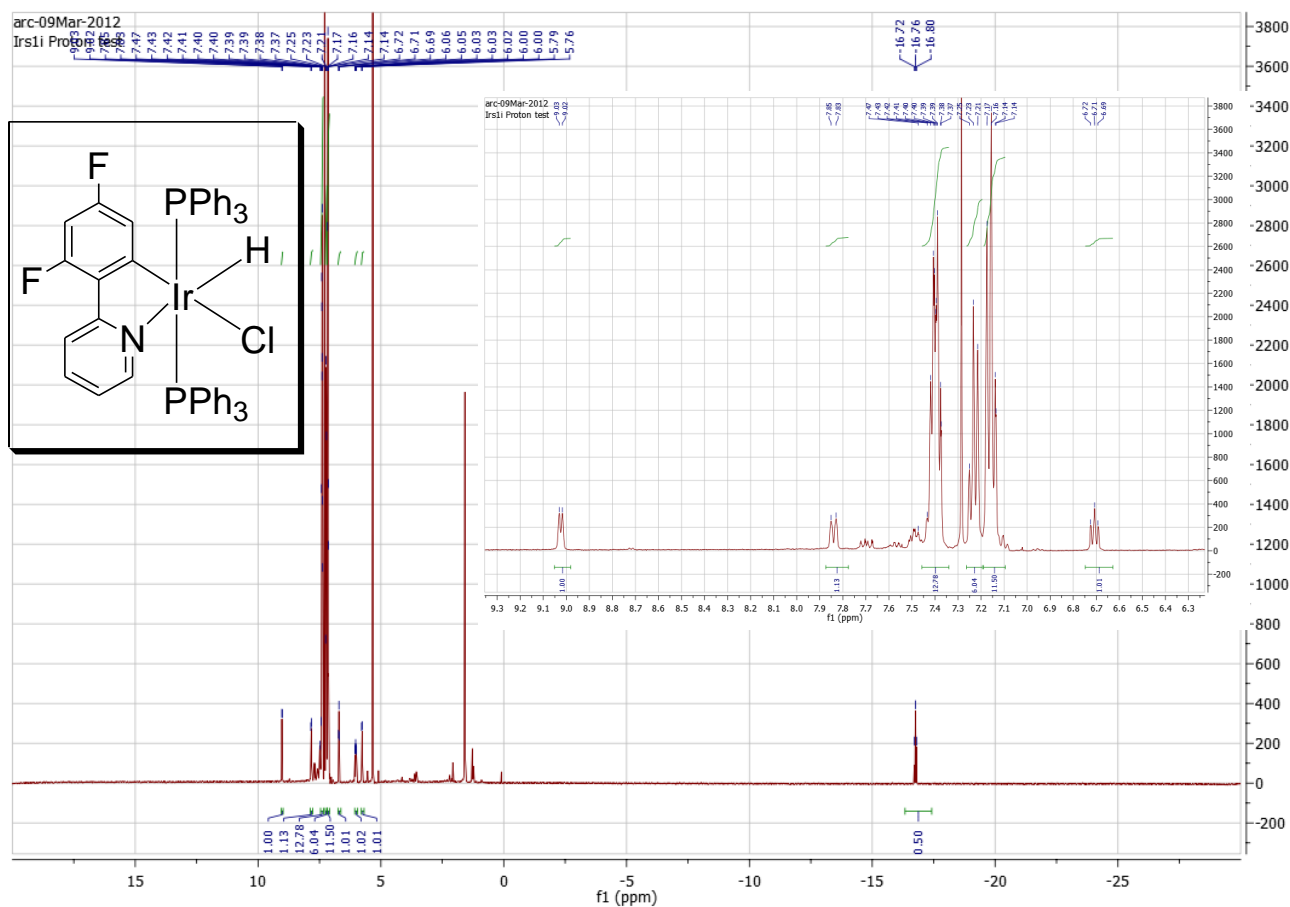

## B

**Fig. S8** <sup>1</sup>H NMR spectrum for F<sub>2</sub>ppy (A) and the complex, **2b** (B) [(For A, δ 8.72 (d, *J* = 4.6 Hz, 1H), 7.99 (dd, *J* = 16.3, 8.3 Hz, 1H), 7.91 (t, *J* = 7.7 Hz, 1H), 7.77 (d, *J* = 7.9 Hz, 1H), 7.44 – 7.35 (m, 2H), 7.24 (t, *J* = 8.4 Hz, 1H); For B, δ 8.94 (d, *J* = 5.5 Hz, 1H), 7.75 (d, *J* = 8.6 Hz, 1H), 7.46 – 7.24 (m, 13H), 7.14 (t, *J* = 7.3 Hz, 6H), 7.10 – 7.04 (m, 12H), 6.66 – 6.55 (m, 1H), 5.94 (ddd, *J* = 13.1, 9.0, 2.4 Hz, 1H), 5.69 (dd, *J* = 9.5, 2.1 Hz, 1H)].

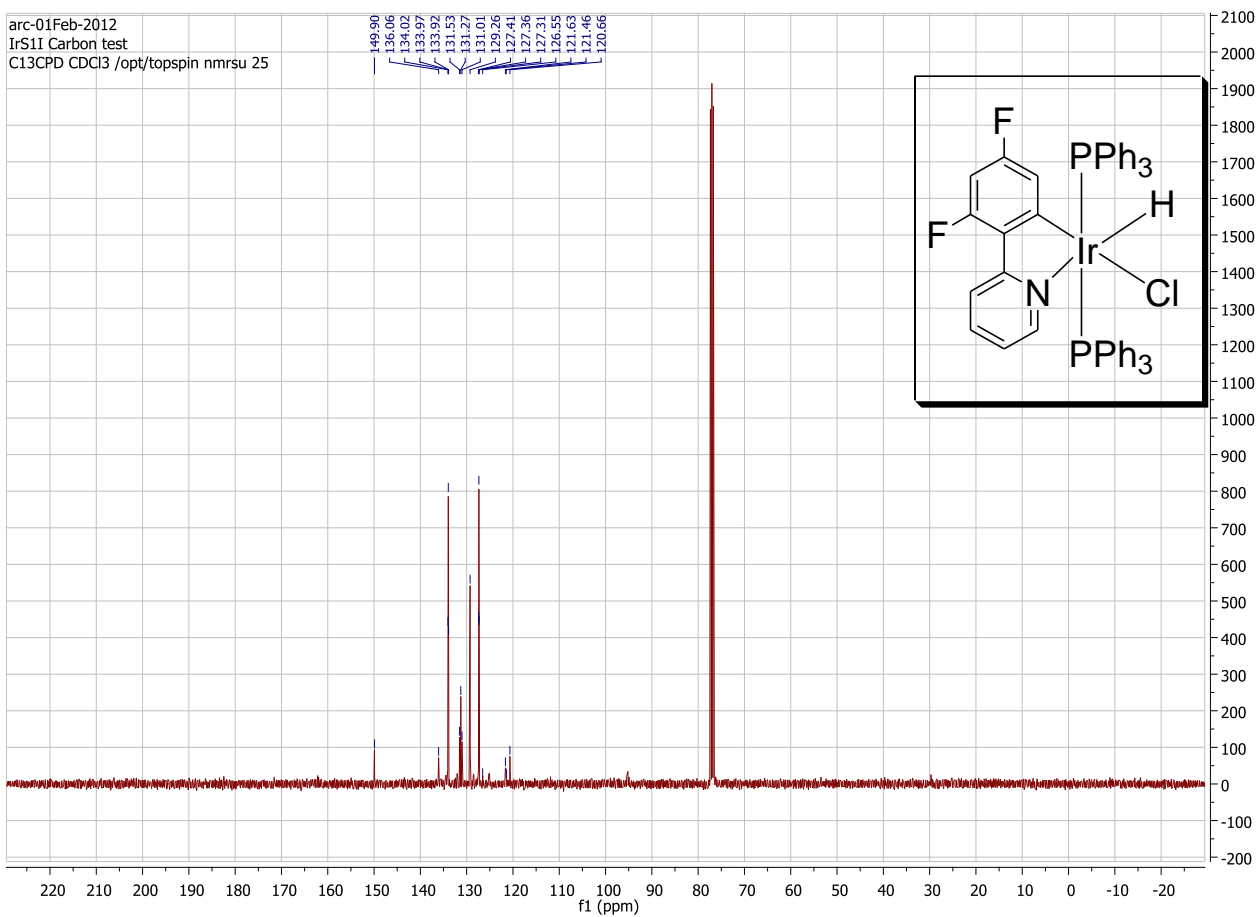

**Fig. S9** <sup>13</sup>CNMR spectrum for **2b** ( $\delta$  149.90, 136.06, 134.02, 133.97, 133.92, 131.53, 131.27, 131.01, 129.26, 127.41, 127.36, 127.31, 126.55, 121.63, 121.46, 120.66)

..

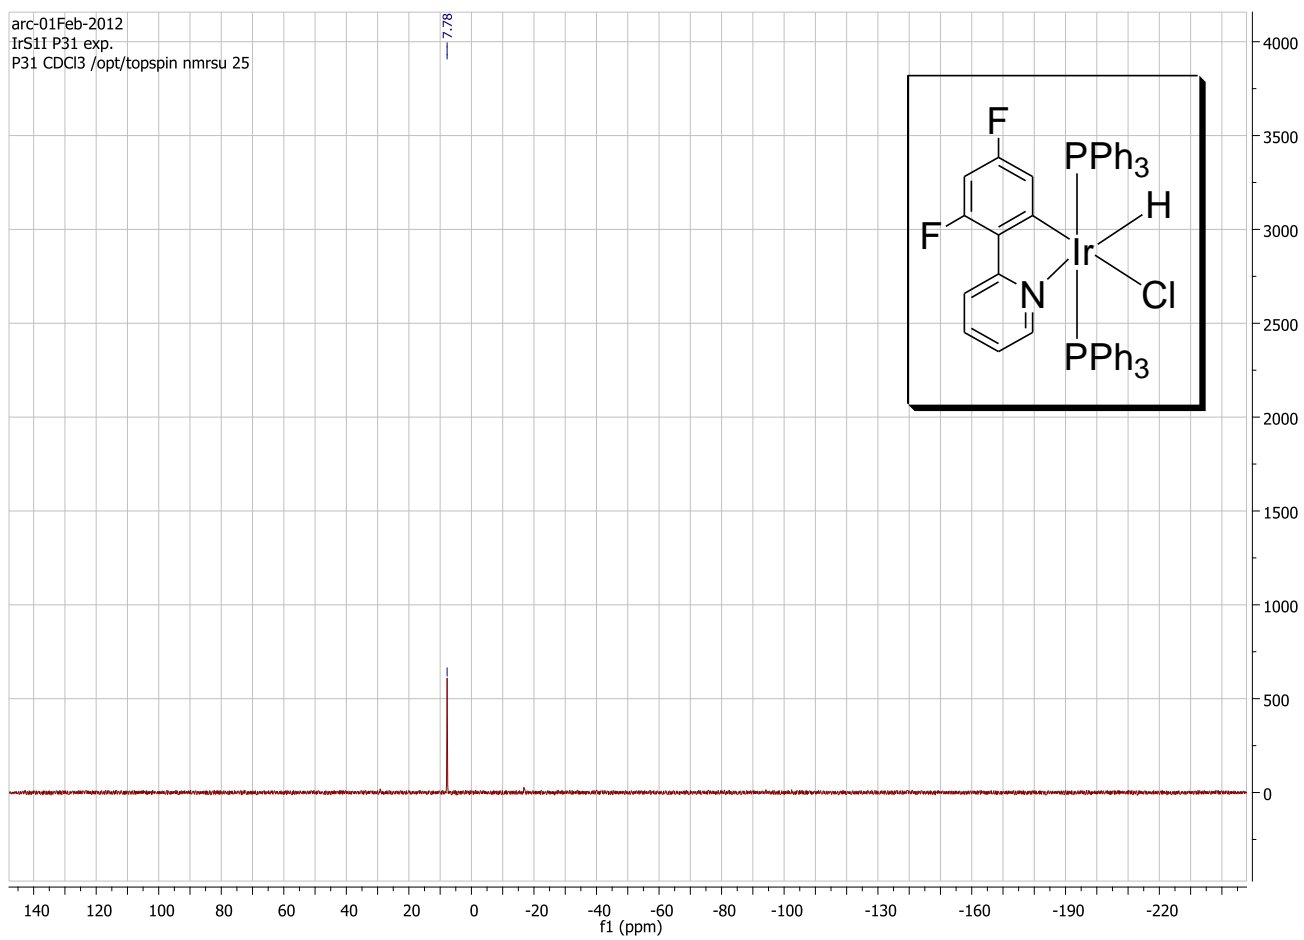

**Fig. S10** <sup>31</sup>P NMR spectrum for **2b** ( $\delta$ , 7.78ppm).

..

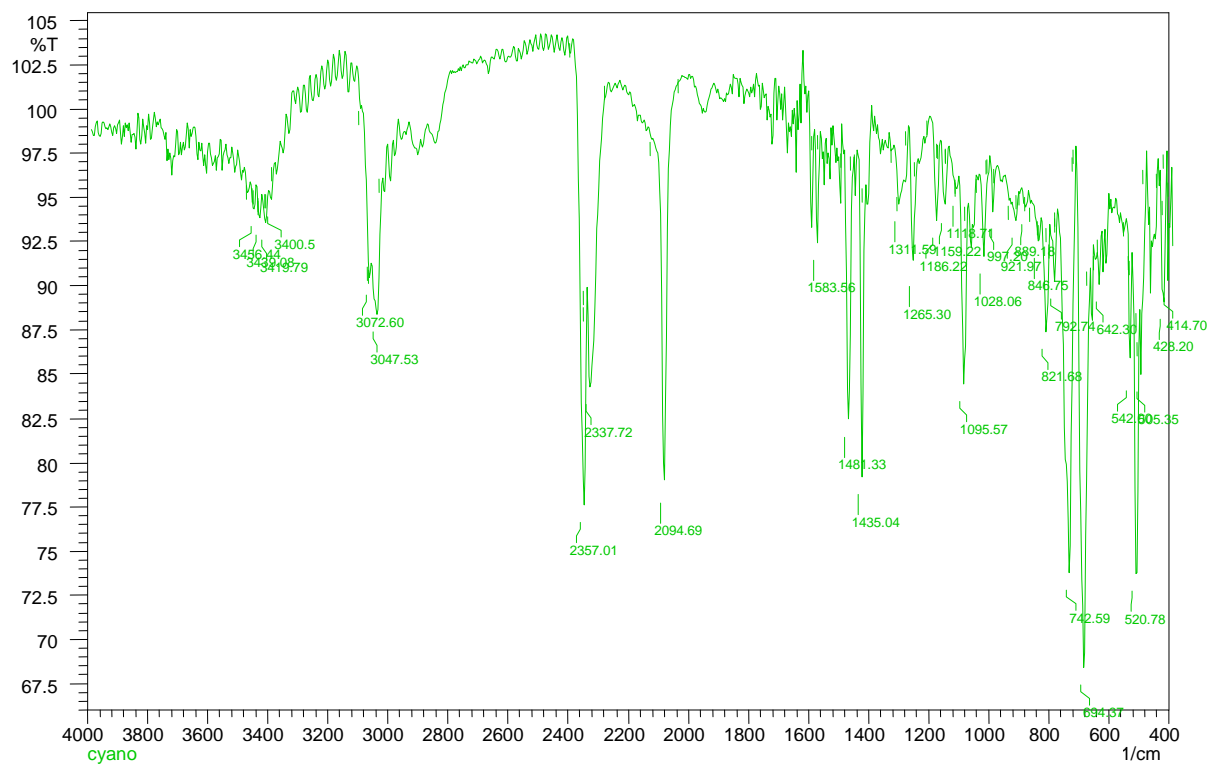

**Fig. S11** FTIR spectra of the complex **2a** (IR band observed at 2094cm<sup>-1</sup> shows the stretching frequency for Ir-H)

..

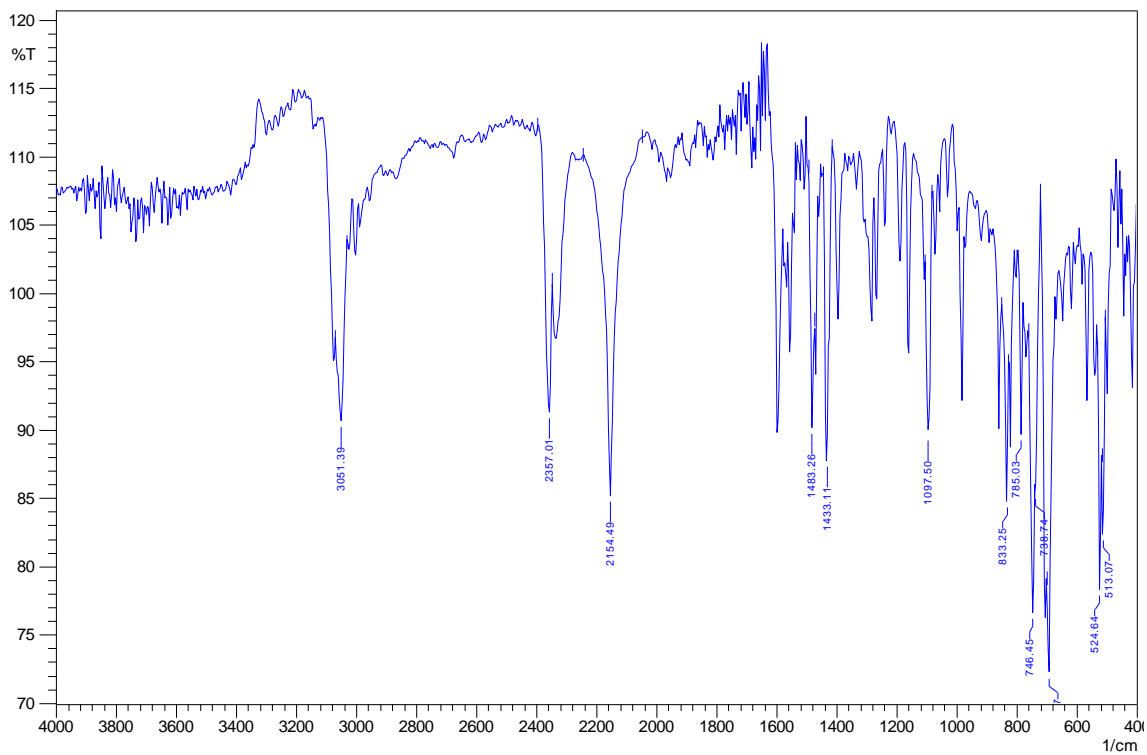

**Fig. S12** FTIR spectra of the complex **2b** ( IR band observed at  $2154\text{cm}^{-1}$  shows the stretching frequency for Ir-H)



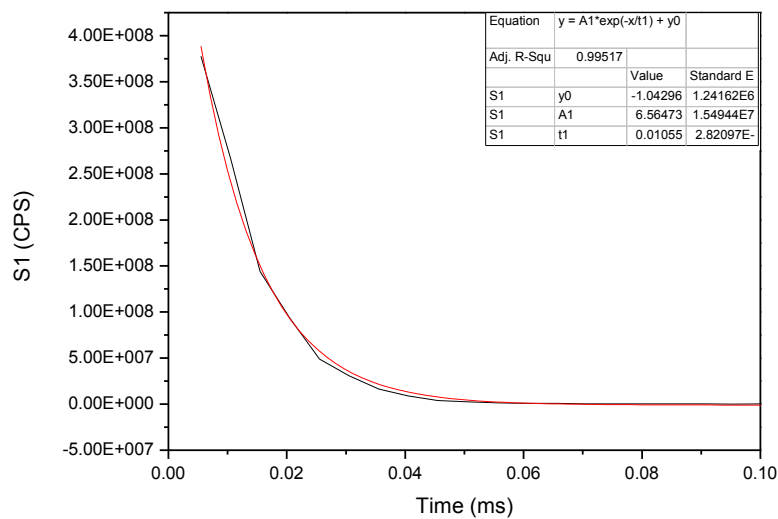

A

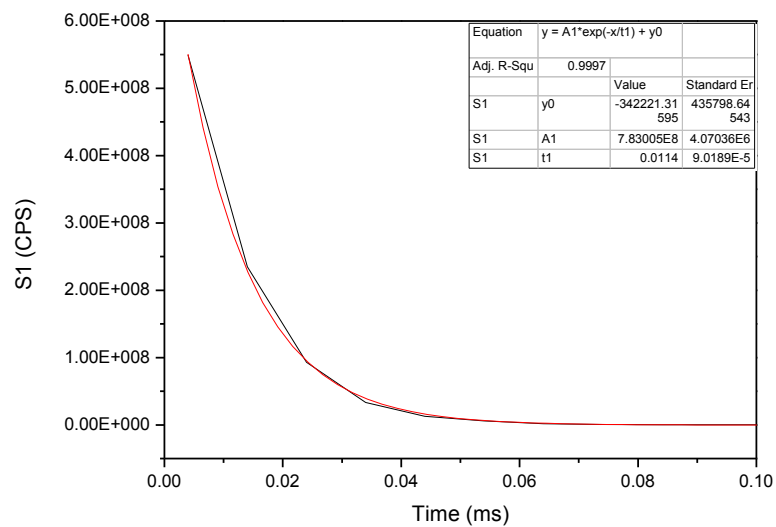

B

**Fig. S13** Luminescent life-time decay curve in thin-film of **2a** [shown in (A)] and **2b** [shown in (B)] (black, raw data and red, single exponential fitting)

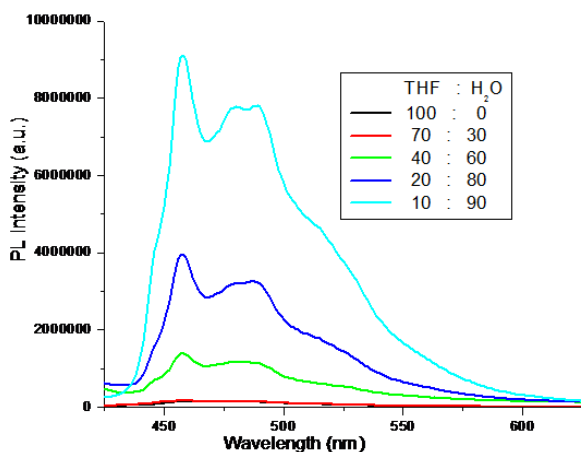

**Fig. S14** PL emission spectra show gradual enhancement of emission intensity of **2b** with increasing concentration of water into the solution of THF (462nm, 482nm).

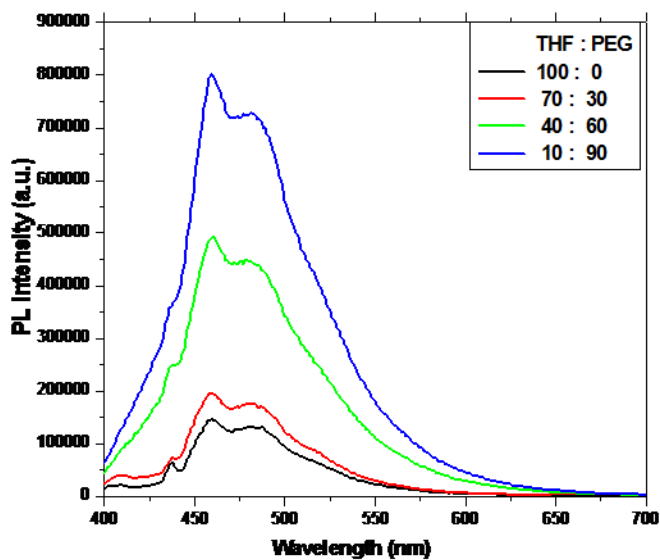

**Fig. S15** PL emission spectra showing gradual enhancement of emission intensity of **2b** with increasing concentration of PEG into the solution of THF (460nm, 482nm).

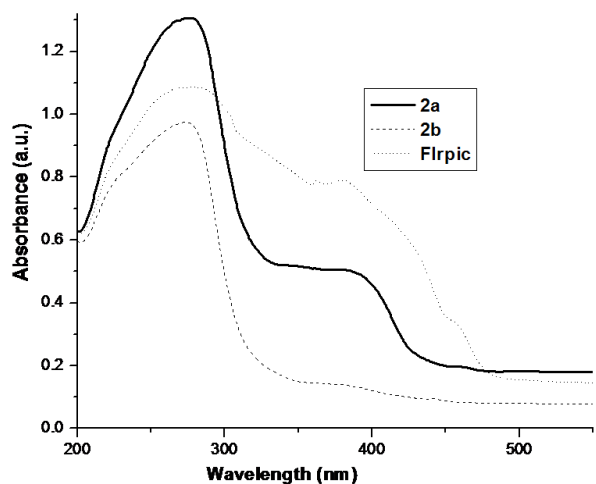

**A**

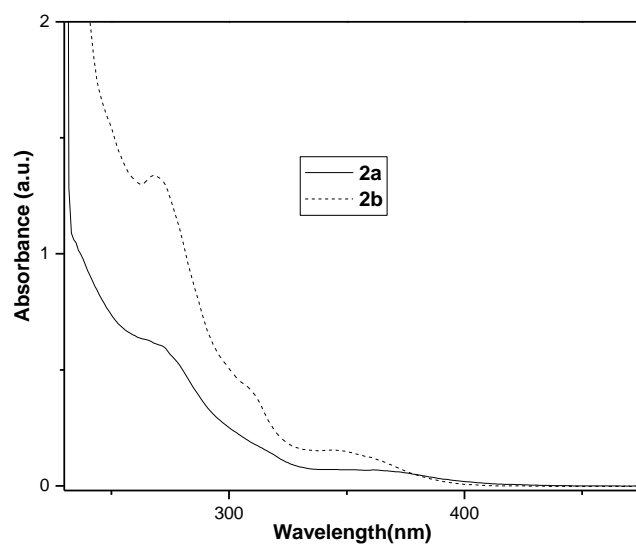

**B**

**Fig. S16** Absorbance spectrum (A) for the solid state complexes of **2a** (274nm, 386nm, 461nm), **2b** (273nm, 378nm, 445nm) and Flrpic (376nm, 382nm, 458nm); (B) for the solution state complexes **2a** (271nm, 314nm and 364nm) and **2b** (269nm, 308nm and 348nm) (in  $10^{-4}$ M DCM).

..

**Table S1** Crystal data and structure refinement for **2b**.

---

|                                   |                                                                                             |
|-----------------------------------|---------------------------------------------------------------------------------------------|
| Empirical formula                 | C <sub>47</sub> H <sub>36</sub> ClF <sub>2</sub> IrNP <sub>2</sub>                          |
| Formula weight                    | 942.38                                                                                      |
| Temperature                       | 100K                                                                                        |
| Wavelength                        | 0.71073 Å                                                                                   |
| Crystal system                    | Orthorhombic                                                                                |
| Space group                       | <i>Pna</i> 2 <sub>1</sub>                                                                   |
| Unit cell dimensions              | a = 32.2085(4) Å; b = 12.2682(1) Å; c = 9.6830(1) Å<br>$\alpha = \beta = \gamma = 90^\circ$ |
| Volume                            | 3826.14 Å <sup>3</sup>                                                                      |
| Z                                 | 4                                                                                           |
| Density (calculated)              | 1.636 Mg/m <sup>3</sup>                                                                     |
| Absorption coefficient            | 3.692 mm <sup>-1</sup>                                                                      |
| F(000)                            | 1868                                                                                        |
| Crystal size                      | 0.2 × 0.2 × 0.1 mm <sup>3</sup>                                                             |
| Theta range for data collection   | 2.45 to 37.03°                                                                              |
| Index ranges                      | 0 ≤ h ≤ 54; 0 ≤ k ≤ 20; 0 ≤ l ≤ 16                                                          |
| Reflections collected             | 10162                                                                                       |
| Independent reflections           | 9908 [R(int) = 2.23%]                                                                       |
| Completeness to theta             | 40.08°, 98.9%                                                                               |
| Absorption correction             | SADABS                                                                                      |
| Max. and min. transmission        | 0.709 and 0.5255                                                                            |
| Refinement method                 | Full-matrix least-squares on F <sup>2</sup>                                                 |
| Data / restraints / parameters    | 10162/1/487                                                                                 |
| Goodness-of-fit on F <sup>2</sup> | 1.062                                                                                       |
| Final R indices [I > 2σ(I)]       | R1 = 0.0223, wR2 = 0.0617                                                                   |
| R indices (all data)              | R1 = 0.0233, wR2 = 0.0622                                                                   |
| Largest diff. peak and hole       | 1.932, -2567 e.Å <sup>-3</sup>                                                              |

---

..

**Table S2** Selected Bond lengths [Å] and angles [°] for **2b**

---

|             |           |
|-------------|-----------|
| Ir1- C19    | 1.998(3)  |
| Ir1 - N1    | 2.160(2)  |
| Ir1- P1     | 2.3199(6) |
| Ir1 - P2    | 2.3278(6) |
| Ir1 - Cl1   | 2.4641(7) |
| <br>        |           |
| C19 Ir1 N1  | 78.99(10) |
| C19 Ir1 P1  | 91.25(8)  |
| N1 Ir1 P1   | 95.37(6)  |
| C19 Ir1 P2  | 95.38(8)  |
| N1 Ir1 P2   | 91.68(6)  |
| P1 Ir1 P2   | 171.13(2) |
| C19 Ir1 Cl1 | 176.97(8) |
| N1 Ir1 Cl1  | 98.14(7)  |
| P1 Ir1 Cl1  | 88.04(2)  |
| P2 Ir1 Cl1  | 85.63(2)  |

---

## References

1. APEX2, SADABS and SAINT; Bruker AXS Inc.: Madison, Wisconsin, USA, 2008.
2. Sheldrick, G. M. *Acta Crystallogr. A* **2008**, *64*, 112-122.
3. Dolomanov, O. V.; Bourhis, L. J.; Gildea, R. J.; Howard, J. A. K.; Puschmann, H. J. *Appl. Cryst.* **2009**, *42*, 339-341.
4. Nardelli, M. J. *Appl. Cryst.* **1995**, *28*, 569.
5. Spek, A. L. *Acta Crystallogr., Sect A* **1990**, *46*, C34.
